# Supplementary material
Source: publisher figshare collection journal article supplement (https://acs.figshare.com/ndownloader/files/3703270)
Supplement: Supplementary file 1 [file 3703270]

# Supporting Information: Dynamical Effects and Product Distributions in Simulated CN + Methane Reactions

Thomas J. Preston<sup>1</sup>, Balázs Hornung<sup>1</sup>, Shubhrangshu Pandit<sup>1</sup>, Jeremy N. Harvey<sup>2</sup>, and Andrew J. Orr-Ewing<sup>1,\*</sup>

<sup>1</sup> *School of Chemistry, University of Bristol, Cantock's Close, Bristol, BS8 1TS, UK.*

<sup>2</sup> *Department of Chemistry, KU Leuven, Celestijnenlaan 200F, B-3001 Leuven (Heverlee), Belgium.*

## I. Potential Energy Surface

The diabatic surfaces used to construct the empirical valence bonding (EVB) potential energy surface are composed of additive potential energy terms. Each term describes a specific motion in the molecular complex. All functional forms we use here are identical to our previous work on the  $\text{Cl} + \text{CH}_4 \rightarrow \text{HCl} + \text{CH}_3$  reaction.<sup>1</sup> The functional forms are listed here with the fitted parameters, and are combined with electronic structure calculations of energies at the UCCSD-UHF/aug-cc-pVDZ level, using geometries obtained from modified BB1K/6-31G(d) [see ref. 2] calculations. Full descriptions of the terms are available elsewhere.<sup>1</sup>

### a. Functions and Parameters

#### i. Stretches

Bond stretches are given by Morse functions,

$$E(r_{ij}) = D_0 \left[ 1 - \exp \left( -\beta (r_{ij} - r_{ij,0}) \right) \right]^2. \quad (\text{S1})$$

Subscripts  $i$  and  $j$  denote atom pairs (see Table S1).

Table S1: Stretching Parameters

| Species         | Stretch | $D_0 / \text{kJ}\cdot\text{mol}^{-1}$ | $r_{ij,0} / \text{\AA}$ | $\beta / \text{\AA}^{-1}$ |
|-----------------|---------|---------------------------------------|-------------------------|---------------------------|
| CH <sub>4</sub> | C-H     | 473.0                                 | 1.098                   | 1.824                     |
| CN              | C-N     | 720.2                                 | 1.180                   | 2.617                     |
| CH <sub>3</sub> | C-H     | 555.2                                 | 1.097                   | 1.781                     |
| HCN             | H-CN    | 581.1                                 | 1.080                   | 1.802                     |

## ii. Bends and Out-of-Plane Motions

Harmonic bends are given by

$$E(\theta_{ijk}) = k_b(\theta_{ijk} - \theta_{ijk,0})^2. \quad (\text{S2})$$

Subscripts  $i, j$  and  $k$  denote atoms between which angles are specified (see Table S2) and  $k_b$  is the associated quadratic force constant.

Table S2: Bending Parameters.

| Species         | Bend  | $k_b / \text{kJ}\cdot\text{mol}^{-1}\cdot\text{degree}^{-2}$ | $\theta_{ijk,0} / \text{degree}$ |
|-----------------|-------|--------------------------------------------------------------|----------------------------------|
| CH <sub>4</sub> | H-C-H | 0.0386                                                       | 109.47                           |
| CH <sub>3</sub> | H-C-H | 0.0302                                                       | 120                              |
| HCN             | H-C-N | 0.0176                                                       | 180                              |

Table S3: Improper (Out-of-Plane) Bending Parameters

| Bend            | $k_b / \text{kJ}\cdot\text{mol}^{-1}\cdot\text{degree}^{-2}$ | $\theta_{ijk,0} / \text{degree}$ |
|-----------------|--------------------------------------------------------------|----------------------------------|
| CH <sub>3</sub> | 0.0157                                                       | 0.0                              |

## iii. van der Waals Interactions

The van der Waals interactions use the following Buckingham-Corner function,<sup>3</sup> with a damping function included as in our CH<sub>4</sub> + Cl work.<sup>1</sup>

$$V(x_{ij}) = \varepsilon_{ij} \left( \frac{8-2c_6}{\beta-8} \exp[\beta_{ij}(1-x_{ij})] - c_6 x_{ij}^{-6} - c_8 x_{ij}^{-8} \right), \quad (\text{S3})$$

$$x_{ij} = \frac{r_{ij}}{r_{ij,0}},$$

$$c_8 = \frac{6c_6 + \beta - \beta c_6}{\beta - 8},$$

$$f(x_{ij}) = \exp \left[ -4(x_{ij} - 1)^3 \right].$$

Subscripts  $i$  and  $j$  denote atom pairs (see Table S4). The damping function  $f(x_{ij})$  is applied for  $x_{ij} < 1$ .

Table S4: Van der Waals Parameters.

| Atom |                                                    |                         |              |       |
|------|----------------------------------------------------|-------------------------|--------------|-------|
| Pair | $\varepsilon_{ij} / \text{kJ}\cdot\text{mol}^{-1}$ | $r_{ij,0} / \text{\AA}$ | $\beta_{ij}$ | $c_6$ |
| C-C  | 0.87                                               | 4.00                    | 8.87         | 2.91  |
| C-N  | 0.87                                               | 4.00                    | 8.87         | 2.91  |
| C-H  | 0.11                                               | 3.68                    | 8.80         | 2.48  |
| N-H  | 0.11                                               | 3.68                    | 8.80         | 2.48  |
| H-H  | 0.15                                               | 2.96                    | 10.25        | 3.27  |

#### iv. Coupling

The coupling term is a two-dimensional elliptical Gaussian:

$$V_{12}(r_{C-H}, r_{H-CN}) = A \exp \left[ \begin{array}{c} -b_{11}(r_{C-H} - r_{C-H}^*)^2 - b_{22}(r_{H-CN} - r_{H-CN}^*)^2 \\ -b_{12}(r_{C-H} - r_{C-H}^*)(r_{H-CN} - r_{H-CN}^*) \end{array} \right], \quad (\text{S4})$$

$$\begin{bmatrix} b_{11} & \frac{b_{12}}{2} \\ \frac{b_{12}}{2} & b_{22} \end{bmatrix} = \begin{bmatrix} \frac{\cos^2 \theta}{2\sigma_{C-H}^2} + \frac{\sin^2 \theta}{2\sigma_{H-CN}^2} & \frac{\sin 2\theta}{-4\sigma_{C-H}^2} + \frac{\sin 2\theta}{4\sigma_{H-CN}^2} \\ \frac{\sin 2\theta}{-4\sigma_{C-H}^2} + \frac{\sin 2\theta}{4\sigma_{H-CN}^2} & \frac{\sin^2 \theta}{2\sigma_{C-H}^2} + \frac{\cos^2 \theta}{2\sigma_{H-CN}^2} \end{bmatrix}.$$

The parameters are as follows:  $A$  is the amplitude of the Gaussian function;  $r_{C-H}$  and  $r_{H-CN}$  are the  $\text{H}_3\text{C-H}$  and  $\text{H-CN}$  bond lengths respectively;  $r_{C-H}^*$  and  $r_{H-CN}^*$  are the coordinates of the centre

of the Gaussian coupling function;  $\sigma_{C-H}$  and  $\sigma_{H-CN}$  are the widths of the Gaussian function; and  $b_{12}$  defines the angles between the main axis of the coupling term and the  $r_{C-H}$  and  $r_{H-CN}$  vectors.

Table S5: Coupling Parameters

| A / kJ·mol <sup>-1</sup> | $r_{C-H}^*$ / Å | $\sigma_{C-H}$ / Å | $r_{H-CN}^*$ / Å | $\sigma_{H-CN}$ / Å | $\theta$ / degree |
|--------------------------|-----------------|--------------------|------------------|---------------------|-------------------|
| 173.7624                 | 1.28983         | 1.02745            | 1.28753          | 0.615503            | 151.268           |

## b. Average Error Plot from Final Fit

We perform two distinct checks on the EVB surface relative to the *ab initio* UCCSD-UHF/aug-cc-pVDZ//BB1K/6-31G(d) energies. The first is shown in the main text as Figure 1. The geometries shown therein were not used for fitting, but their EVB and UCCSD energies show remarkable agreement. Here, we show EVB energies minus UCCSD energies from snapshots of trajectories in the top panel of **Figure S1**. The average error is about 4 kJ·mol<sup>-1</sup>. The bottom panel plots the same data, but as EVB energy versus *ab initio* energy.

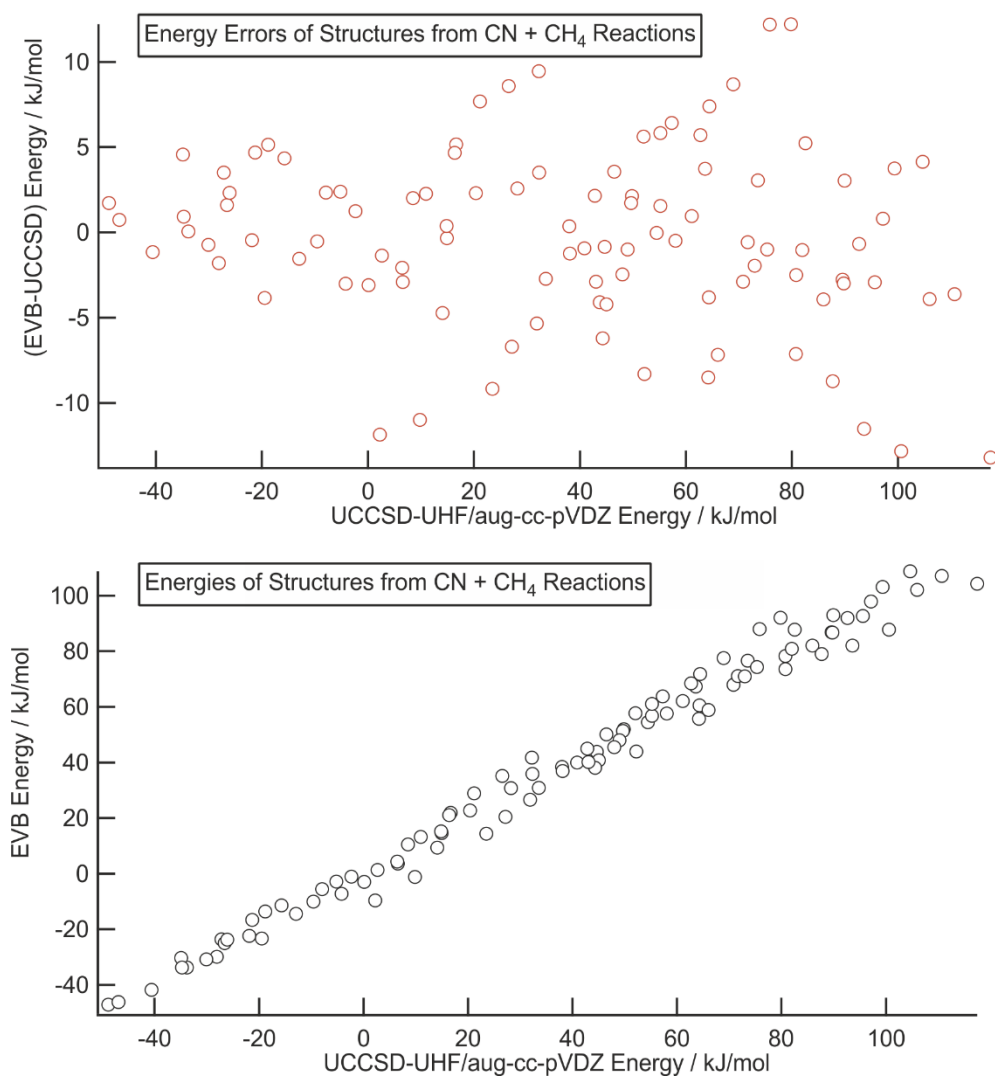

**Figure S1.** Comparisons of the energies obtained on the EVB surface and the UHF-UCCSD surface for various structures.

### c. EVB and NIST Vibrational Frequencies

The harmonic vibrational frequencies of the EVB surface reproduce tabulated vibrational frequencies reliably well. They are listed and compared in **Table S6**.

Table S6. Harmonic Frequencies (in  $\text{cm}^{-1}$ ) of Separated Species in the EVB Fit and from the NIST Webbook.

| CH <sub>4</sub>                                 |                  | CD <sub>4</sub>   |      |      |
|-------------------------------------------------|------------------|-------------------|------|------|
| Mode <sup>a</sup>                               | EVB <sup>b</sup> | NIST <sup>b</sup> | EVB  | NIST |
| $\nu_1$                                         | 2966             | 2917              | 2098 | 2109 |
| $\nu_2$                                         | 1489             | 1534              | 1053 | 1092 |
| $\nu_3$                                         | 3134             | 3019              | 2337 | 2259 |
| $\nu_4$                                         | 1330             | 1306              | 998  | 996  |
| CN                                              |                  |                   |      |      |
|                                                 | EVB              | NIST              |      |      |
|                                                 | 2073             | 2069              |      |      |
| CH <sub>3</sub>                                 |                  | CD <sub>3</sub>   |      |      |
| Mode                                            | EVB              | NIST              | EVB  | NIST |
| $\nu_1$                                         | 3134             | 3004              | 2219 | 2157 |
| $\nu_2$                                         | 612              | 606               | 476  | 458  |
| $\nu_3$                                         | 3330             | 3160              | 2493 | 2381 |
| $\nu_4$                                         | 1385             | 1400              | 1017 | 1026 |
| HCN                                             |                  | DCN               |      |      |
| Mode                                            | EVB              | NIST              | EVB  | NIST |
| $\nu_1$                                         | 3429             | 3311              | 2683 | 2630 |
| $\nu_2$                                         | 690              | 712               | 550  | 569  |
| $\nu_3$                                         | 2139             | 2097              | 1973 | 1925 |
| <sup>a</sup> Mode ordering follows NIST Webbook |                  |                   |      |      |
| <sup>b</sup> Energies in $\text{cm}^{-1}$       |                  |                   |      |      |

**Table S7** summarizes the harmonic vibrational frequencies of the transition state on the EVB PES.

Table S7: Harmonic Frequencies of the Vibrational Modes of the Transition State on the EVB PES.

| Mode Description <sup>a</sup>                   | Frequency / cm <sup>-1</sup> |
|-------------------------------------------------|------------------------------|
| Reaction coordinate                             | 187 <i>i</i>                 |
| Frustrated rotation                             | 91                           |
| Frustrated rotation                             | 91                           |
| Frustrated rotation                             | 234                          |
| Frustrated rotation                             | 234                          |
| CH <sub>3</sub> umbrella                        | 1283                         |
| C-H* wag                                        | 1315                         |
| C-H* wag                                        | 1315                         |
| CH <sub>3</sub> deformation                     | 1449                         |
| CH <sub>3</sub> deformation                     | 1449                         |
| C-H* stretch                                    | 2067                         |
| CN stretch                                      | 2174                         |
| CH <sub>3</sub> symmetric stretch               | 3026                         |
| CH <sub>3</sub> asymmetric stretch              | 3153                         |
| CH <sub>3</sub> asymmetric stretch              | 3153                         |
| <sup>a</sup> H* denotes the transferred H atom. |                              |

#### d. Structure of the Transition State on the EVB PES

Bond lengths and bond angles of the transition state structure on the EVB PES are listed in **Table S8**.

Table S8: Structural Parameters of the Transition State on the EVB PES.

| Coordinate <sup>a</sup>                         | Bond Length / Å |
|-------------------------------------------------|-----------------|
| C–H                                             | 1.098           |
| H <sub>3</sub> C–H*                             | 1.145           |
| H*–CN                                           | 1.740           |
| C–N                                             | 1.180           |
| Bond Angle / °                                  |                 |
| < H–C–H*                                        | 108.4           |
| <sup>a</sup> H* denotes the transferred H atom. |                 |

## II. Trajectory Analysis

### a. Energy distribution plots for CN + CD<sub>4</sub>

Cyanide collisions with perdeuterated methane give product distributions that are similar to the CN + CH<sub>4</sub> reactive scattering results presented in the main article. A larger fraction of energy appears in CD<sub>3</sub> vibration and less energy partitions to translational energy, as shown in **Figure S2**. Softer vibrational modes lead to more energy in those modes. Better mass-matching between fragments leads to less energy in TKER. Mean energies in the different degrees of freedom of the products are summarized in **Table S9**.



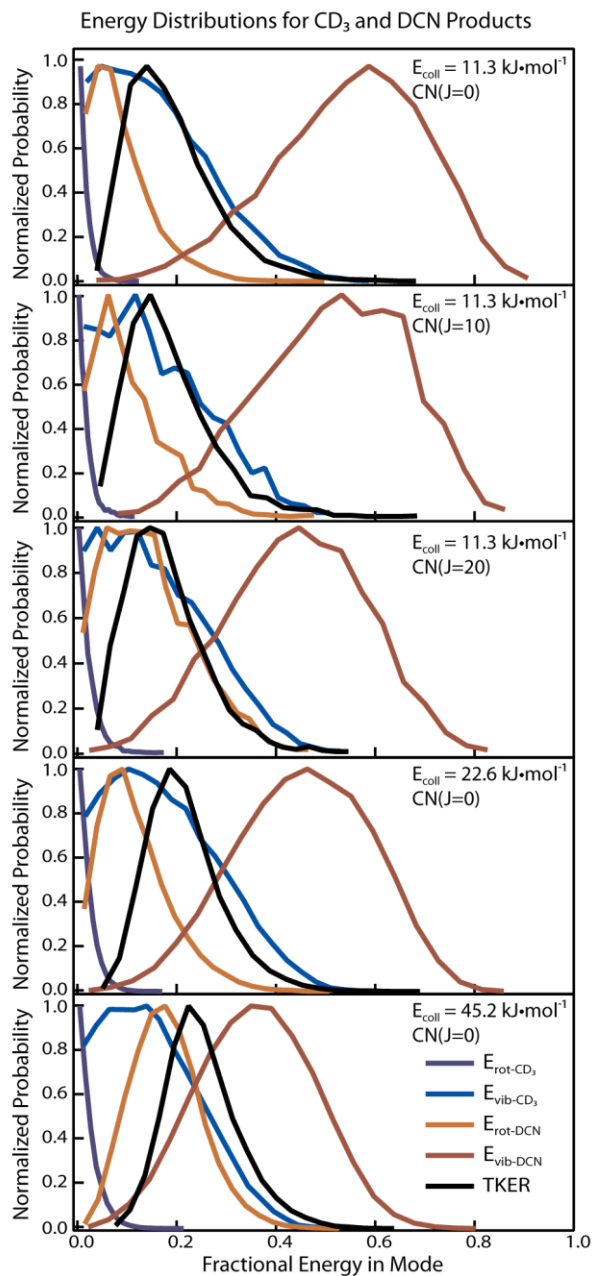

**Figure S2.** Energy partitioning into CN + CD<sub>4</sub> reaction products. The analysis and description in the main text for CN + CH<sub>4</sub> is applicable to these deuterated results.

Table S9: Collision Energy Dependence of the Mean Energies in the Various Degrees of Freedom of the Products of the CN + CD<sub>4</sub> Reaction.

| E <sub>coll</sub> <sup>a</sup> | Mean Product Energy <sup>a</sup> |                              |                 |                  |                   |
|--------------------------------|----------------------------------|------------------------------|-----------------|------------------|-------------------|
|                                | CD <sub>3</sub><br>Rotation      | CD <sub>3</sub><br>Vibration | DCN<br>Rotation | DCN<br>Vibration | Kinetic<br>Energy |
| 11.3                           | 1.4                              | 16.3                         | 8.6             | 55.6             | 18.9              |
| 11.3 (CN <i>J</i> =10)         | 1.7                              | 16.6                         | 10.9            | 53.7             | 19.0              |
| 11.3 (CN <i>J</i> =20)         | 2.3                              | 17.7                         | 16.1            | 49.0             | 19.7              |
| 22.6                           | 2.3                              | 19.8                         | 13.1            | 51.3             | 24.3              |
| 45.2                           | 3.3                              | 20.6                         | 24.4            | 48.8             | 34.3              |

<sup>a</sup> All energies are specified in kJ / mol.

### b. Scattering images for CN + CD<sub>4</sub>

The scattering images for CN + CD<sub>4</sub> products are remarkably similar to those for CN + CH<sub>4</sub>, as shown in **Figure S3**.

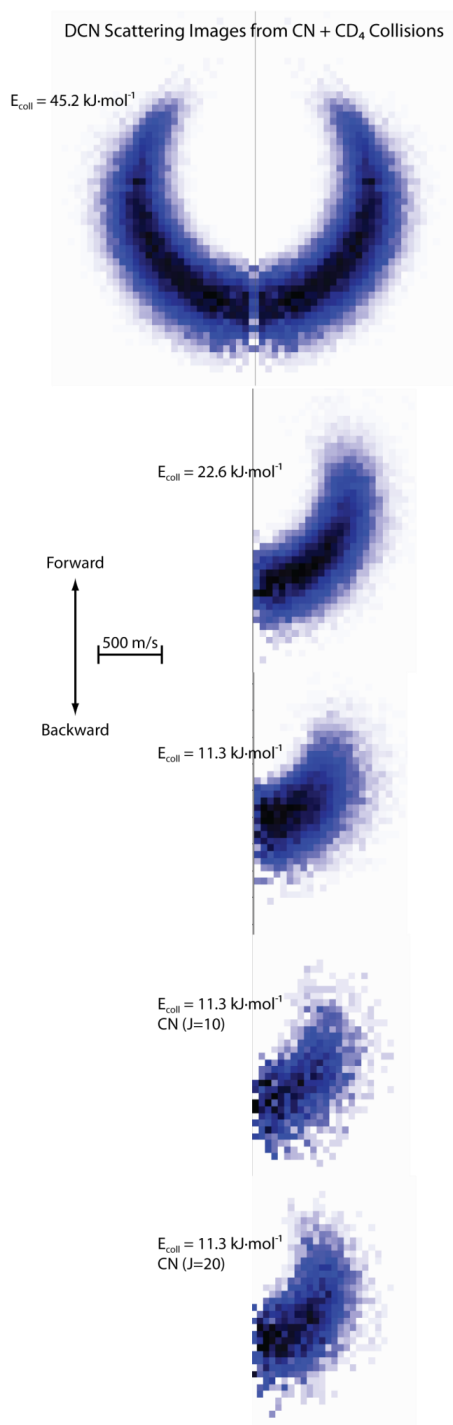

**Figure S3.** DCN scattering images from CN + CD<sub>4</sub> reactions. The trends in scattering are the same as for CH<sub>4</sub> in the main text.

### c. Product Angular Scattering Distributions

The product recoil velocity distributions in the center-of-mass frame are represented as simulated velocity map images in Figure 5 of the main manuscript and Figure S3 of the Supporting Information. In **Figure S4**, we show the dependence of the product scattering angle distributions on collision energy in a more conventional representation.

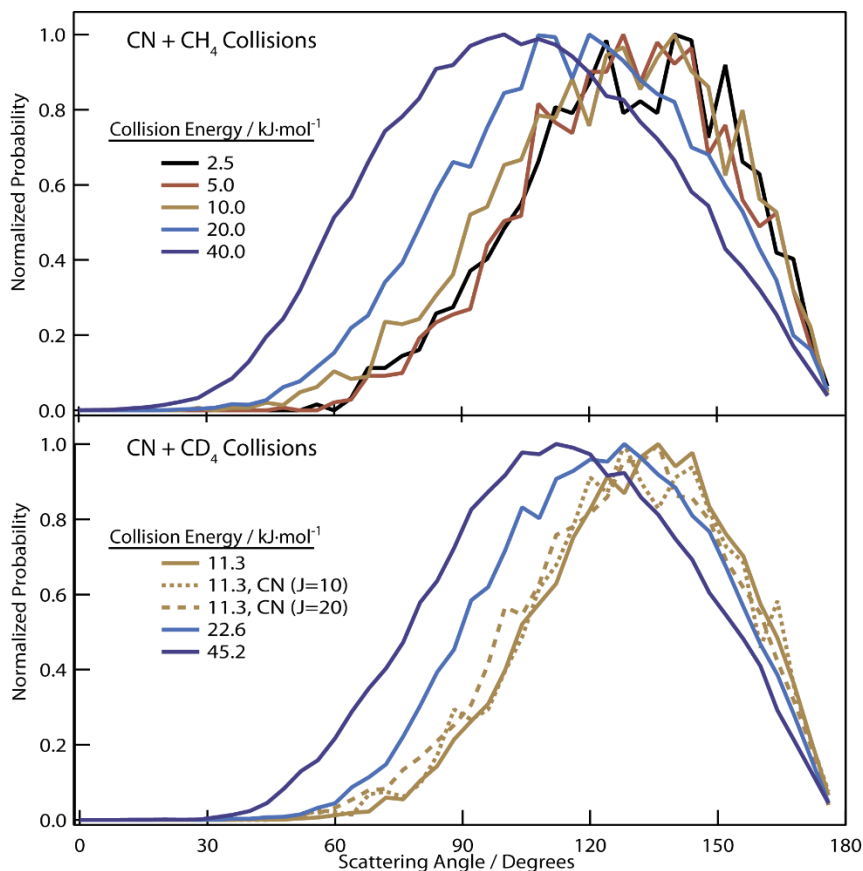

**Figure S4:** Product scattering angle distributions in the center-of-mass frame for CN + CH<sub>4</sub> (top) and CN + CD<sub>4</sub> (bottom) reactions. The scattering distributions are shown for the different collision energies indicated in the inset keys, and are averaged over all product speeds. In the case of CN + CD<sub>4</sub>, the effect of CN rotational excitation is also examined by comparing angular scattering distributions for CN(*J*=0, 10 and 20) at the same collision energy.

#### d. Correlation Coefficients for Changing Collision Energies

Many of the correlation coefficients change with collision energy  $E_{coll}$ . We show the evolution of some of them in the main text. Here, in **Figure S5**, we show the difference of each correlation coefficient for each collision energy subtracted from the values for  $E_{coll} = 40.0$  kJ/mol.

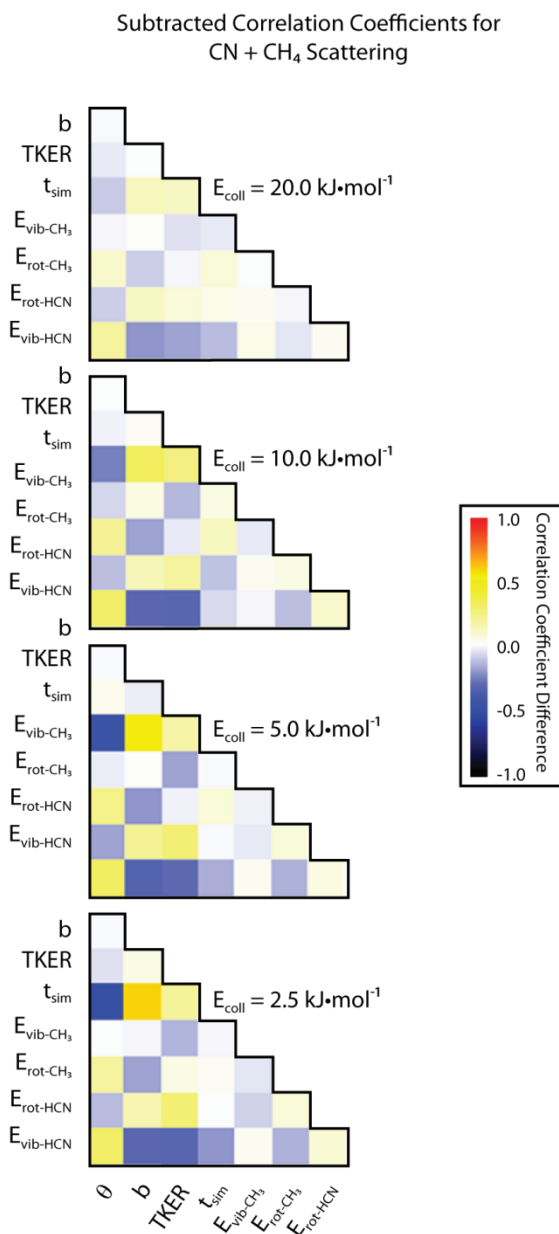

**Figure S5.** Correlation coefficient differences for  $CN + CH_4 \rightarrow HCN + CH_3$  reactions. Each value has been subtracted from its value at  $E_{coll} = 40.0$  kJ/mol.

## References

1. Hornung, B.; Harvey, J. N.; Preston, T. J.; Dunning, G. T.; Orr-Ewing, A. J. Empirical Valence Bond Theory Studies of the  $\text{CH}_4 + \text{Cl} \rightarrow \text{CH}_3 + \text{HCl}$  Reaction. *J. Phys. Chem. A* **2015**, *119*, 9590-9598.
2. Glowacki, D. R.; Orr-Ewing, A. J.; Harvey, J. N. Product Energy Deposition of CN + Alkane H Abstraction Reactions in Gas and Solution Phases. *J. Chem. Phys.* **2011**, *134*, 214508.
3. Buckingham, R. A.; Corner, J. Tables of 2nd Virial and Low-Pressure Joule-Thomson Coefficients for Intermolecular Potentials with Exponential Repulsion. *Proc R Soc Lon Ser-A* **1947**, *189*, 118-129.
